# Supplementary material for: Unraveling the power of NAP-CNB’s machine learning-enhanced tumor neoantigen prediction
Source: eLife journal article supplement (doi:10.7554/elife.95010), 2024-06-05
Supplement: fig1-data1 [file elife-95010-fig1-data1-v1.zip]

The top rows show the immune response of vaccinated animals after stimulation with the indicated peptides, while the bottom rows display the response of non-vaccinated animals after restimulation with the same peptides

The columns show to duplicates of different animals i.e. column 1 and 2 correspond to different measurements of the same animal. Groups of 5 animals were tested for each condition

**Plate 1:**

a line and b line: controls non-immunized animals tested against TRP2

**c** line (immunized), **d** line (non-immunized) mice: tested against **WIZ**  
**e** line (immunized), **f** line (non-immunized) mice: tested against **LRRC28**  
**g** line (immunized), **h** line (non-immunized) mice: tested against **PNP**

A11, B11, C11, D11, E11: positive Control (TRP2 + anti-CD3CD28)

**Plate 2:**

**a** line (immunized), **b** line (non-immunized) mice: tested against **ADAR**  
**c** line (immunized), **d** line (non-immunized) mice: tested against **MIX**  
**e** line (immunized), **f** line (non-immunized) mice: tested against **HERC6**

H6, h7, h8, h9, h10: positive Control (TRP2 + anti-CD3CD28)

H1, h2, h3, h4, h5, negative controls (PBS)
